# Supplementary material for: Robotic Services Acceptance in Smart Environments With Older Adults: User Satisfaction and Acceptability Study
Source: PubMed Central journal article supplement (PMC6231879; doi:10.2196/jmir.9460), 2018-09-21
Supplement: jmir_v20i9e264_app1.pdf [file jmir_v20i9e264_app1.pdf]

### Overview of Related Works

| Study | Participants | User-Robot Interaction | Evaluation tools                                       | Robot                              | Methodology                       |
|-------|--------------|------------------------|--------------------------------------------------------|------------------------------------|-----------------------------------|
| [18]  | 22           | No                     | Interviews and questionnaires                          | No                                 | Pictures of robots                |
| [19]  | 20           | No                     | Focus group discussions and semi-structured interviews | No                                 | Pictures of robots<br>Video clips |
| [20]  | 18           | No                     | Semi-structured focus group and questionnaires         | RobuLAB 10                         | Live robot demonstration          |
| [21]  | 14           | No                     | Focus group discussion and questionnaires              | Tele-presence Kubi and Beam robots | Video clips                       |
| [22]  | 49           | Yes                    | Interviews and questionnaires                          | Hobbit PT1                         | Remote controlled robot           |
| [24]  | 16           | Yes                    | Questionnaires                                         | DARCI robot                        | M1 autonomous mobile manipulator  |
| [25]  | 16           | Yes                    | Questionnaires                                         | ASTROMOBILE                        | Autonomous robot                  |
| [26]  | 30           | Yes                    | Interviews                                             | Tele-presence robot                | Tele-operated by user             |
| [27]  | 25           | Yes                    | Questionnaires                                         | iRubi                              | Stationary robot                  |
| [29]  | 2            | Yes                    | Qualitative tools and Questionnaires                   | Giraff                             | Tele-operated                     |
