# Supplementary material for: Robotic Services Acceptance in Smart Environments With Older Adults: User Satisfaction and Acceptability Study
Source: PubMed Central journal article supplement (PMC6231879; doi:10.2196/jmir.9460), 2018-09-21
Supplement: jmir_v20i9e264_app2.pdf [file jmir_v20i9e264_app2.pdf]

## Appearance Questionnaire

Please, Rate your opinion using a scale from 1 = strongly disagree to 5 = strongly agree

|                 |                                                                                          | DORO                                                                              | CORO                                                                               | DUSTCART                                                                            |
|-----------------|------------------------------------------------------------------------------------------|-----------------------------------------------------------------------------------|------------------------------------------------------------------------------------|-------------------------------------------------------------------------------------|
|                 |                                                                                          |  |  |  |
| <b>Item A1</b>  | The robot looks dangerous                                                                | 1 2 3 4 5                                                                         | 1 2 3 4 5                                                                          | 1 2 3 4 5                                                                           |
| <b>Item A2</b>  | The appearance of the robot inspires confidence in me                                    | 1 2 3 4 5                                                                         | 1 2 3 4 5                                                                          | 1 2 3 4 5                                                                           |
| <b>Item A3</b>  | The appearance of the robot is familiar to me because it reminds me of .....             | ...a domestic worker<br>1 2 3 4 5                                                 | ... a janitor<br>1 2 3 4 5                                                         | ... a delivery man<br>1 2 3 4 5                                                     |
| <b>Item A4</b>  | The appearance of the robot is aesthetically pleasing                                    | 1 2 3 4 5                                                                         | 1 2 3 4 5                                                                          | 1 2 3 4 5                                                                           |
| <b>Item A5</b>  | The colors of the robot are appropriate                                                  | 1 2 3 4 5                                                                         | 1 2 3 4 5                                                                          | 1 2 3 4 5                                                                           |
| <b>Item A6</b>  | The appearance of the robot is out of proportion and non-symmetric                       | 1 2 3 4 5                                                                         | 1 2 3 4 5                                                                          | 1 2 3 4 5                                                                           |
| <b>Item A7</b>  | The appearance of the robot is in good agreement with .....                              | ... a domestic environment<br>1 2 3 4 5                                           | ... a condominium environment<br>1 2 3 4 5                                         | ... an outdoor environment<br>1 2 3 4 5                                             |
| <b>Item A8</b>  | The robot is too big and bulky compared to the environment                               | 1 2 3 4 5                                                                         | 1 2 3 4 5                                                                          | 1 2 3 4 5                                                                           |
| <b>Item A9</b>  | The complete robot and its various parts seem robust                                     | 1 2 3 4 5                                                                         | 1 2 3 4 5                                                                          | 1 2 3 4 5                                                                           |
| <b>Item A10</b> | The materials that make up the robot are appropriate                                     | 1 2 3 4 5                                                                         | 1 2 3 4 5                                                                          | 1 2 3 4 5                                                                           |
| <b>Item A11</b> | The appearance of the robot is unable to communicate its functions                       | 1 2 3 4 5                                                                         | 1 2 3 4 5                                                                          | 1 2 3 4 5                                                                           |
| <b>Item A12</b> | The position of the touch-screen is perfect for its use                                  | 1 2 3 4 5                                                                         | 1 2 3 4 5                                                                          | 1 2 3 4 5                                                                           |
| <b>Item A13</b> | The presence of coloured lights in the eyes of the robot is useless and tells me nothing | 1 2 3 4 5                                                                         | 1 2 3 4 5                                                                          | 1 2 3 4 5                                                                           |
| <b>Item A14</b> | The presence of a head on the robot restricts or inhibits the interaction with the robot | 1 2 3 4 5                                                                         | 1 2 3 4 5                                                                          | 1 2 3 4 5                                                                           |
| <b>Item A15</b> | The appearance of the robot invites me to touch and interact with it                     | 1 2 3 4 5                                                                         | 1 2 3 4 5                                                                          | 1 2 3 4 5                                                                           |
