# Supplementary material for: Robotic Services Acceptance in Smart Environments With Older Adults: User Satisfaction and Acceptability Study
Source: PubMed Central journal article supplement (PMC6231879; doi:10.2196/jmir.9460), 2018-09-21
Supplement: jmir_v20i9e264_app3.pdf [file jmir_v20i9e264_app3.pdf]

## Ad-Hoc Questionnaire

Please, Rate your opinion using a scale from 1 = strongly disagree to 5 = strongly agree  
1=Strongly disagree, 2=Disagree, 3=Neither agree nor disagree, 4=Agree, 5=Strongly agree

|                 |                                                                                                       |   |   |   |   |   |
|-----------------|-------------------------------------------------------------------------------------------------------|---|---|---|---|---|
| <b>Item Q1</b>  | I would use the robot for doing <sup>a</sup> .... , in case of need (i.e. if I was sick)              | 1 | 2 | 3 | 4 | 5 |
| <b>Item Q2</b>  | I would be willing to use the <sup>a</sup> .... service if it could help the family/caregiver's work. | 1 | 2 | 3 | 4 | 5 |
| <b>Item Q3</b>  | I think my independence would be improved by the use of the robot for <sup>a</sup> .....              | 1 | 2 | 3 | 4 | 5 |
| <b>Item Q4</b>  | I was too embarrassed in using the robot, around the community or the family.                         | 1 | 2 | 3 | 4 | 5 |
| <b>Item Q5</b>  | I was nervous doing the <sup>a</sup> .... service with the robot.                                     | 1 | 2 | 3 | 4 | 5 |
| <b>Item Q6</b>  | I enjoyed using the robot for doing <sup>a</sup> ..... service                                        | 1 | 2 | 3 | 4 | 5 |
| <b>Item Q7</b>  | I would trust in the robot's ability to perform <sup>a</sup> .... service.                            | 1 | 2 | 3 | 4 | 5 |
| <b>Item Q8</b>  | If the robot shopped for me, it would be too intrusive for my privacy.                                | 1 | 2 | 3 | 4 | 5 |
| <b>Item Q9</b>  | I found the tablet easy to use to perform the <sup>a</sup> .... service.                              | 1 | 2 | 3 | 4 | 5 |
| <b>Item Q10</b> | I could clearly read the messages on the tablet.                                                      | 1 | 2 | 3 | 4 | 5 |
| <b>Item Q11</b> | I understood what buttons I needed to press to perform the <sup>a</sup> .... service.                 | 1 | 2 | 3 | 4 | 5 |
| <b>Item Q12</b> | I found it easy to speak to the robot to perform the <sup>a</sup> .... service.                       | 1 | 2 | 3 | 4 | 5 |
| <b>Item Q13</b> | I understood what I could say to the robot to perform the <sup>a</sup> .... service.                  | 1 | 2 | 3 | 4 | 5 |
| <b>Item Q14</b> | I could clearly hear what the robot said to me.                                                       | 1 | 2 | 3 | 4 | 5 |

<sup>a</sup> shopping/ garbage/ communication/ reminding/ indoor walking support/ outdoor walking support
