# Supplementary material for: Robotic Services Acceptance in Smart Environments With Older Adults: User Satisfaction and Acceptability Study
Source: PubMed Central journal article supplement (PMC6231879; doi:10.2196/jmir.9460), 2018-09-21
Supplement: jmir_v20i9e264_app4.pdf [file jmir_v20i9e264_app4.pdf]

### Questionnaires Reliability

|                                                                                                                                                                                                                                 | $r^a$ | SB Correction <sup>b</sup> | <i>P</i> value | ICC <sup>c</sup> | $\alpha^d$ |
|---------------------------------------------------------------------------------------------------------------------------------------------------------------------------------------------------------------------------------|-------|----------------------------|----------------|------------------|------------|
| <b>Appearance Questionnaire</b>                                                                                                                                                                                                 |       |                            |                |                  |            |
| DORO                                                                                                                                                                                                                            | .48   | .66                        | <.001          | .46              | .65        |
| CORO                                                                                                                                                                                                                            | .56   | .72                        | <.001          | .56              | .72        |
| ORO                                                                                                                                                                                                                             | .62   | .76                        | <.001          | .54              | .67        |
| <b>Ad-Hoc Questionnaire</b>                                                                                                                                                                                                     |       |                            |                |                  |            |
| Shopping Service                                                                                                                                                                                                                |       |                            |                | .67              | .66        |
| Garbage Service                                                                                                                                                                                                                 |       |                            |                | .70              | .73        |
| Communication Service                                                                                                                                                                                                           |       |                            |                | .67              | .65        |
| Reminding Service                                                                                                                                                                                                               |       |                            |                | .64              | .85        |
| Indoor walking support Service                                                                                                                                                                                                  |       |                            |                | .66              | .69        |
| Outdoor walking support Service                                                                                                                                                                                                 |       |                            |                | .60              | .71        |
| <sup>a</sup> Split-half reliability<br><sup>b</sup> Split-half reliability adjusted using the Spearman–Brown prophecy formula<br><sup>c</sup> intra-class correlation coefficient<br><sup>d</sup> Cronbach's Alpha <sup>e</sup> |       |                            |                |                  |            |
